# Supplementary figures and images for: RNA-Sequencing Based microRNA Expression Signature of Colorectal Cancer: The Impact of Oncogenic Targets Regulated by miR-490-3p
Source: MDPI journal article supplement (doi:10.3390/ijms22189876), 2021-09-13

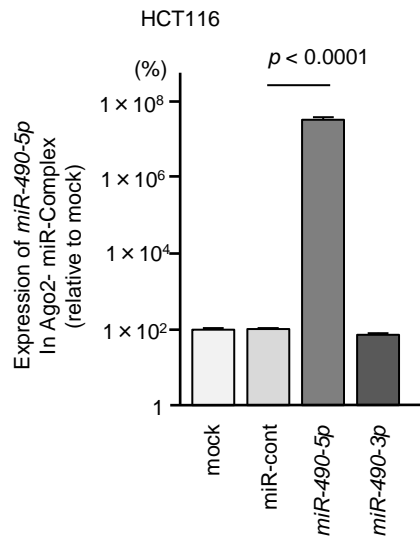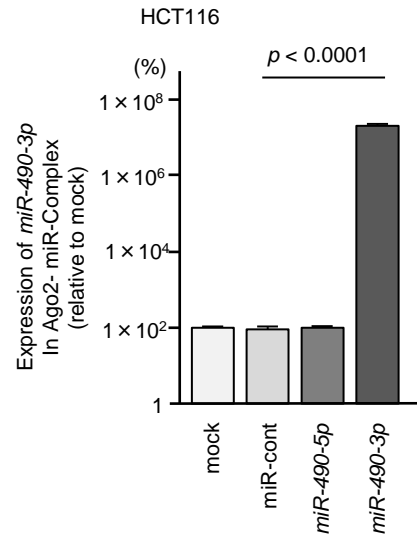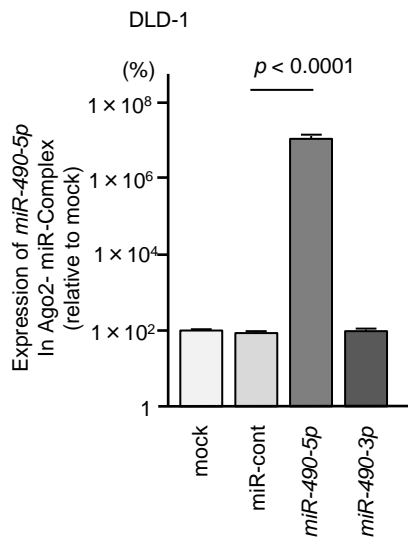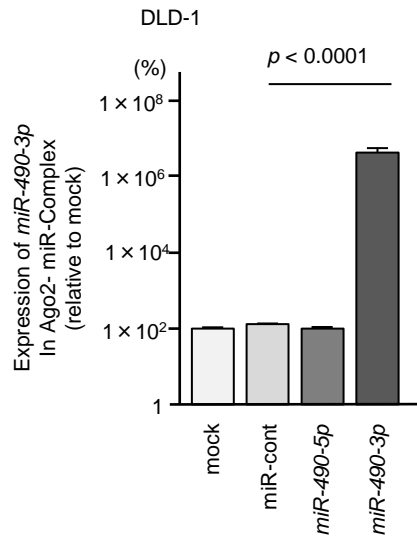

Supplement: s1 [file s1]
